# Supplementary material for: Effect of Native Gastric Mucus on in vivo Hybridization Therapies Directed at Helicobacter pylori
Source: PubMed Central journal article supplement — Mol Ther Nucleic Acids. 2015 Dec 8;4(12):e269–. doi: 10.1038/mtna.2015.46 (PMC5014538; doi:10.1038/mtna.2015.46), 2015-12-08
Supplement: mtna201546x1.pdf [file mtna201546x1.pdf]

## Supplementary material

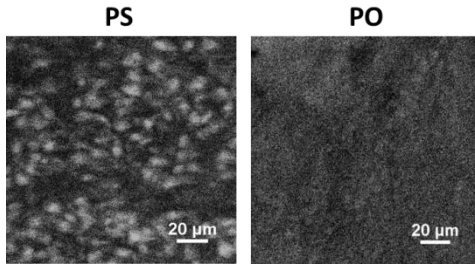

Figure S1 Confocal images of porcine gastric mucus after mixing with respectively PS and PO oligonucleotides. Images from FRAP experiments prior to bleaching.

## Supplementary Materials and Methods

### FRAP model

The local diffusion coefficient ( $D$ ) and the fraction of mobile ( $k$ ) and immobile oligonucleotides can be calculated by fitting the pixel values of the recovery images  $F(x,y,t)$  to the rFRAP model given by the following Eq (1) and (2) <sup>1</sup>:

$$\frac{F(x,y,t)}{F_0} = 1 - \frac{K_0}{4} \left[ \operatorname{erf} \left( \frac{x + \frac{l_x}{2}}{\sqrt{r^2 + 4D_i t}} \right) - \operatorname{erf} \left( \frac{x - \frac{l_x}{2}}{\sqrt{r^2 + 4D_i t}} \right) \right] \times \left[ \operatorname{erf} \left( \frac{y + \frac{l_y}{2}}{\sqrt{r^2 + 4D_i t}} \right) - \operatorname{erf} \left( \frac{y - \frac{l_y}{2}}{\sqrt{r^2 + 4D_i t}} \right) \right] \quad (1)$$

$$F_k(x,y,t) = F(x,y,0) + k[F(x,y,t) - F(x,y,0)] \quad (2)$$

$F_0$  being fluorescence before photobleaching,  $K_0$  the amount of photobleaching,  $l_x$  the width of the bleached rectangle,  $l_y$  the height of the bleached rectangle,  $r^2$  the average of the squared lateral imaging and photobleaching resolution, and  $D$  the diffusion coefficient. The parameter  $r$  takes the

finite imaging and effective bleaching resolution into account. Having the fluorescence recovery  $F(x,y,t)$  defined by Eq.(1), the fraction of mobile molecules ( $k$ ) can be determined by Eq.(2).

### **Supplementary References**

1. Deschout, H, Hagman, J, Fransson, S, Jonasson, J, Rudemo, M, Loren, N, et al. (2010). Straightforward frap for quantitative diffusion measurements with a laser scanning microscope. Opt Express 18: 22886-22905.
